# Supplementary material for: Monitoring Phenolic Compounds in Rice during the Growing Season in Relation to Fungal and Mycotoxin Contamination
Source: PubMed Central journal article supplement (PMC7291125; doi:10.3390/toxins12050341), 2020-05-22
Supplement: toxins-12-00341-s001.pdf [file toxins-12-00341-s001.pdf]

## Supplementary Materials: Monitoring Phenolic Compounds in Rice During the Growing Season in Relation to Fungal and Mycotoxin Contamination

Paola Giorni, Silvia Rastelli, Sofia Fregonara and Terenzio Bertuzzi

**Table S1.** Mean daily temperature (°C) and rainfall (mm) registered during the rice growing season in Castello d'Agogna (PV) in 2018 and 2019.

|                  |       | Mean Daily Temperature (°C) |       |      |      |        |           |
|------------------|-------|-----------------------------|-------|------|------|--------|-----------|
|                  | March | April                       | May   | June | July | August | September |
| <b>Year 2018</b> | 7.0   | 15.9                        | 19.7  | 24.3 | 26.0 | 25.4   | 21.2      |
| <b>Year 2019</b> | 10.0  | 13.8                        | 16.3  | 25.4 | 26.2 | 25.0   | 19.9      |
|                  |       | Rainfall (mm)               |       |      |      |        |           |
|                  | March | April                       | May   | June | July | August | September |
| <b>Year 2018</b> | 90.8  | 87.8                        | 111.4 | 16.2 | 74.4 | 27.2   | 46.6      |
| <b>Year 2019</b> | 3.6   | 82.8                        | 68.2  | 2.0  | 50.8 | 45.6   | 28.4      |
